# Supplementary material for: Reconstructing geographical boundary conditions for palaeoclimate modelling during the Cenozoic
Source: Copernicus journal article supplement (doi:10.5194/cp-12-1635-2016), 2016-08-11
Supplement: Supplementary file [file cp-12-1635-2016-supplement-title-page.pdf › cp-12-1635-2016-supplement-title-page.pdf]

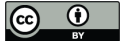

## *Supplement of*

# **Reconstructing geographical boundary conditions for palaeoclimate modelling during the Cenozoic**

**Michiel Baatsen et al.**

*Correspondence to:* Michiel Baatsen (m.l.j.baatsen@uu.nl)

- cp-12-1635-2016-supplement-title-page.pdf
- Supplement\_Final
  - .DS\_Store
  - Additional Figures
    - \* .DS\_Store
    - \* 30Ma\_Paleomag.png
    - \* 38Ma\_HotSpot.png
    - \* 38Ma\_Paleomag.png
    - \* ViewEurasia38.png
    - \* ViewInOc38.png
    - \* ViewNAm38.png
    - \* ViewNPac38.png
    - \* ViewNPole38.png
    - \* ViewSAm38.png
    - \* ViewSPac38.png
    - \* ViewSpole38.png
  - Adjusted\_Files
    - \* .DS\_Store
    - \* Geometries
    - \* Reconstruction\_steps.m
    - \* inpaintn.m
  - Example\_Reconstructions
    - \* 30Ma\_Paleomag.nc
    - \* 38Ma\_HotSpot.nc
    - \* 38Ma\_Paleomag.nc
  - README\_38Ma.txt

- Source\_Files
  - \* .DS\_Store
  - \* AdjMasks.gpml
  - \* Coastlines.gpml
  - \* ContinentalShelves\_exp.gpml
  - \* Globe.gpml
  - \* Land38Ma\_c.gpml
  - \* Oceans38Ma.gpml
  - \* Seas38Ma.gpml
  - \* Seton\_rev701.rot
  - \* Shallow38Ma.gpml
  - \* ShallowSeas.gpml
  - \* TopoMasks38.gpml
  - \* WilsonAR.nc
  - \* vanHinsbergen\_master.rot

The copyright of individual parts of the supplement might differ from the CC-BY 3.0 licence.
